# Supplementary material for: An examination of the effectiveness of the expired drug isoprinosine in preventing aluminum corrosion in alkaline solutions using both computational and experimental techniques
Source: Royal Society of Chemistry journal article supplement (doi:10.1039/d4ra00158c), 2024-01-01

## **Supplemental section for RA-ART-01-2024-000158.R1**

**Title: An examination of the effectiveness of the expired drug Isoprinosine in preventing aluminum corrosion in alkaline solutions using both computational and experimental techniques**

**S. M. Syam<sup>a,\*</sup>, Emad E. El-Katori<sup>b</sup>, Ahmed. A. Elhenawy<sup>c,d</sup>, H. Nady<sup>e,f</sup>, Salah Eid<sup>a,e,\*\*</sup>**

<sup>a</sup>Chemistry Department, Faculty of science, Benha University, Benha, Egypt

<sup>b</sup>Chemistry Department, Faculty of Science, New Valley University, El-Kharga, 72511, Egypt

<sup>c</sup>Chemistry Department, Faculty of Science, Al-Azhar University, Nasr City, 11884, Cairo, Egypt

<sup>d</sup>Chemistry Department, Faculty of Science and Art, AlBaha University, Mukhwah, Al Bahah 65731, Saudi Arabia

<sup>e</sup>Chemistry Department, College of Science and Arts, Alqurayat, Jouf University, Saudi Arabia

<sup>f</sup>Chemistry Department, Faculty of Science, Fayoum University, Fayoum, Egypt

\* Corresponding author. E-mail address: [Samar.seyam@fsc.bu.edu.eg](mailto:Samar.seyam@fsc.bu.edu.eg)

\*\* Corresponding author: [salaheed@ju.edu.sa](mailto:salaheed@ju.edu.sa), (Salah Eid).

Figure S1: Simulated (□□□) and experimentally (◆◆◆) generated Nyquist plot for Al in 0.5 M NaOH in presence of 0.0112 M of Isoprinosine. (*inset*) The corresponding equivalent circuit was used in experimental impedance fit for Al in 0.5 M NaOH without and with different concentrations of Isoprinosine.

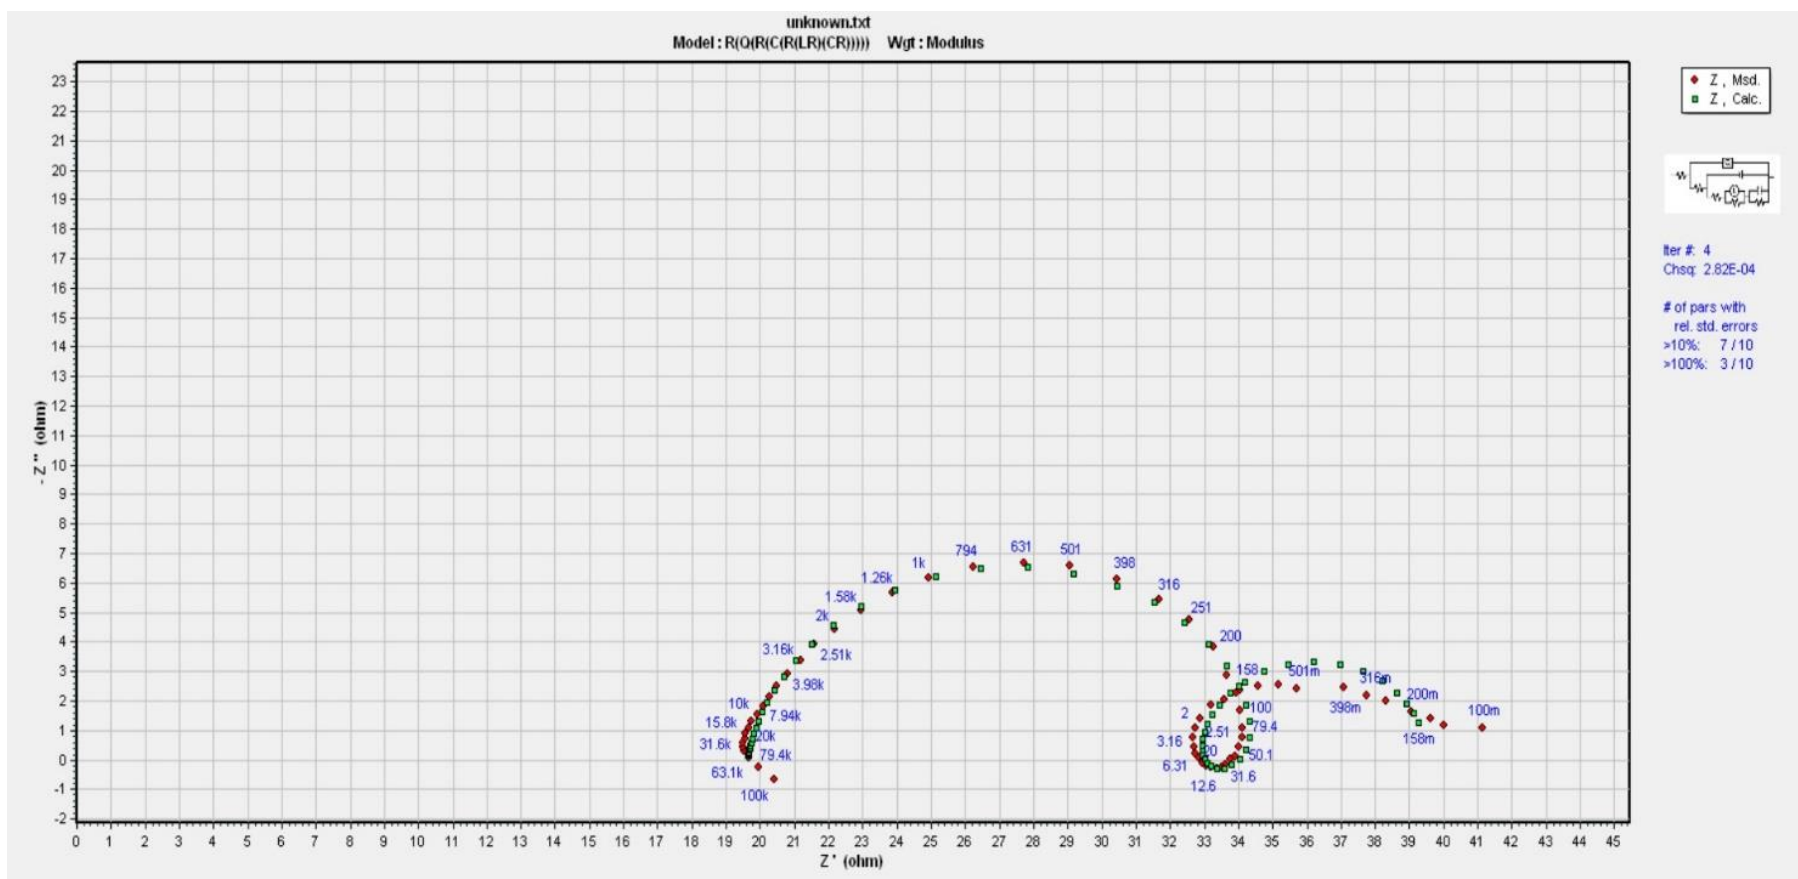

Figure S2: Adsorption isotherm for **Isoprinosine** on Aluminum electrode in 0.5 M NaOH.

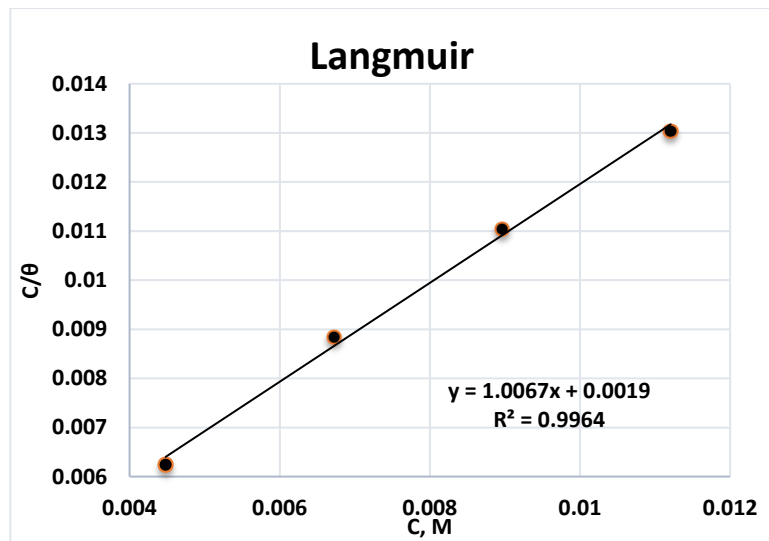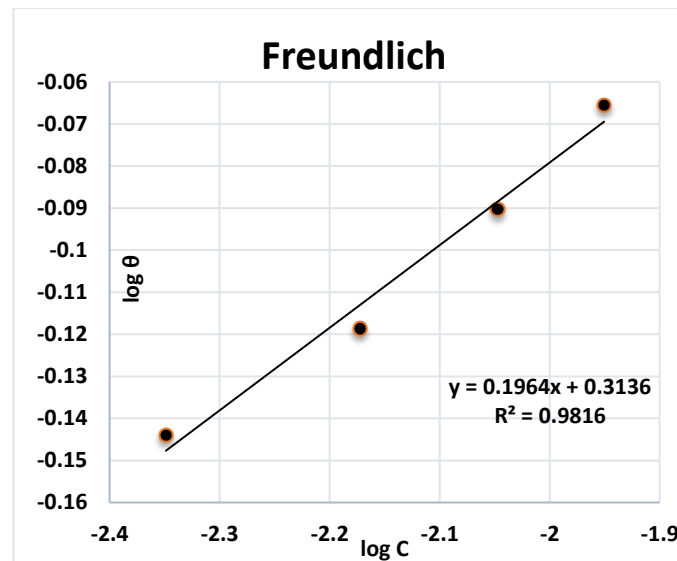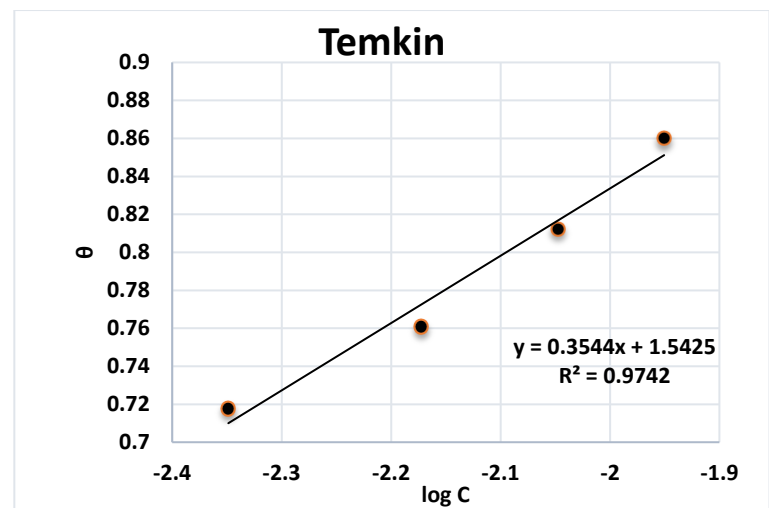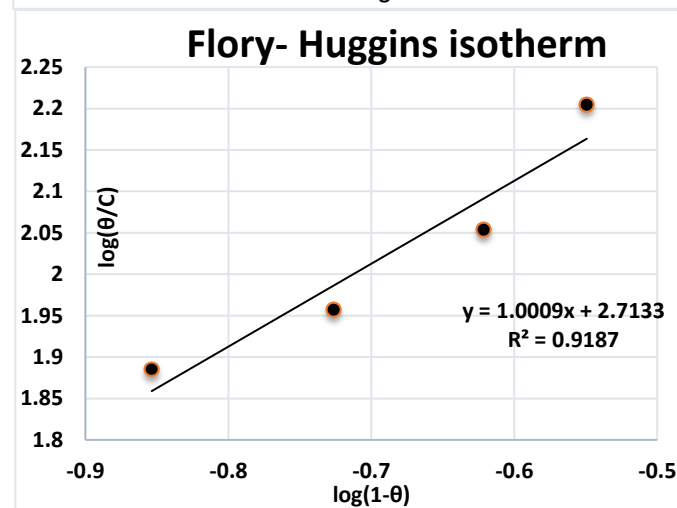

**Figure S3:** Molecular dynamic simulations for the most favorable adsorption mode for **Isoprinosine** component on Al (110) surface.

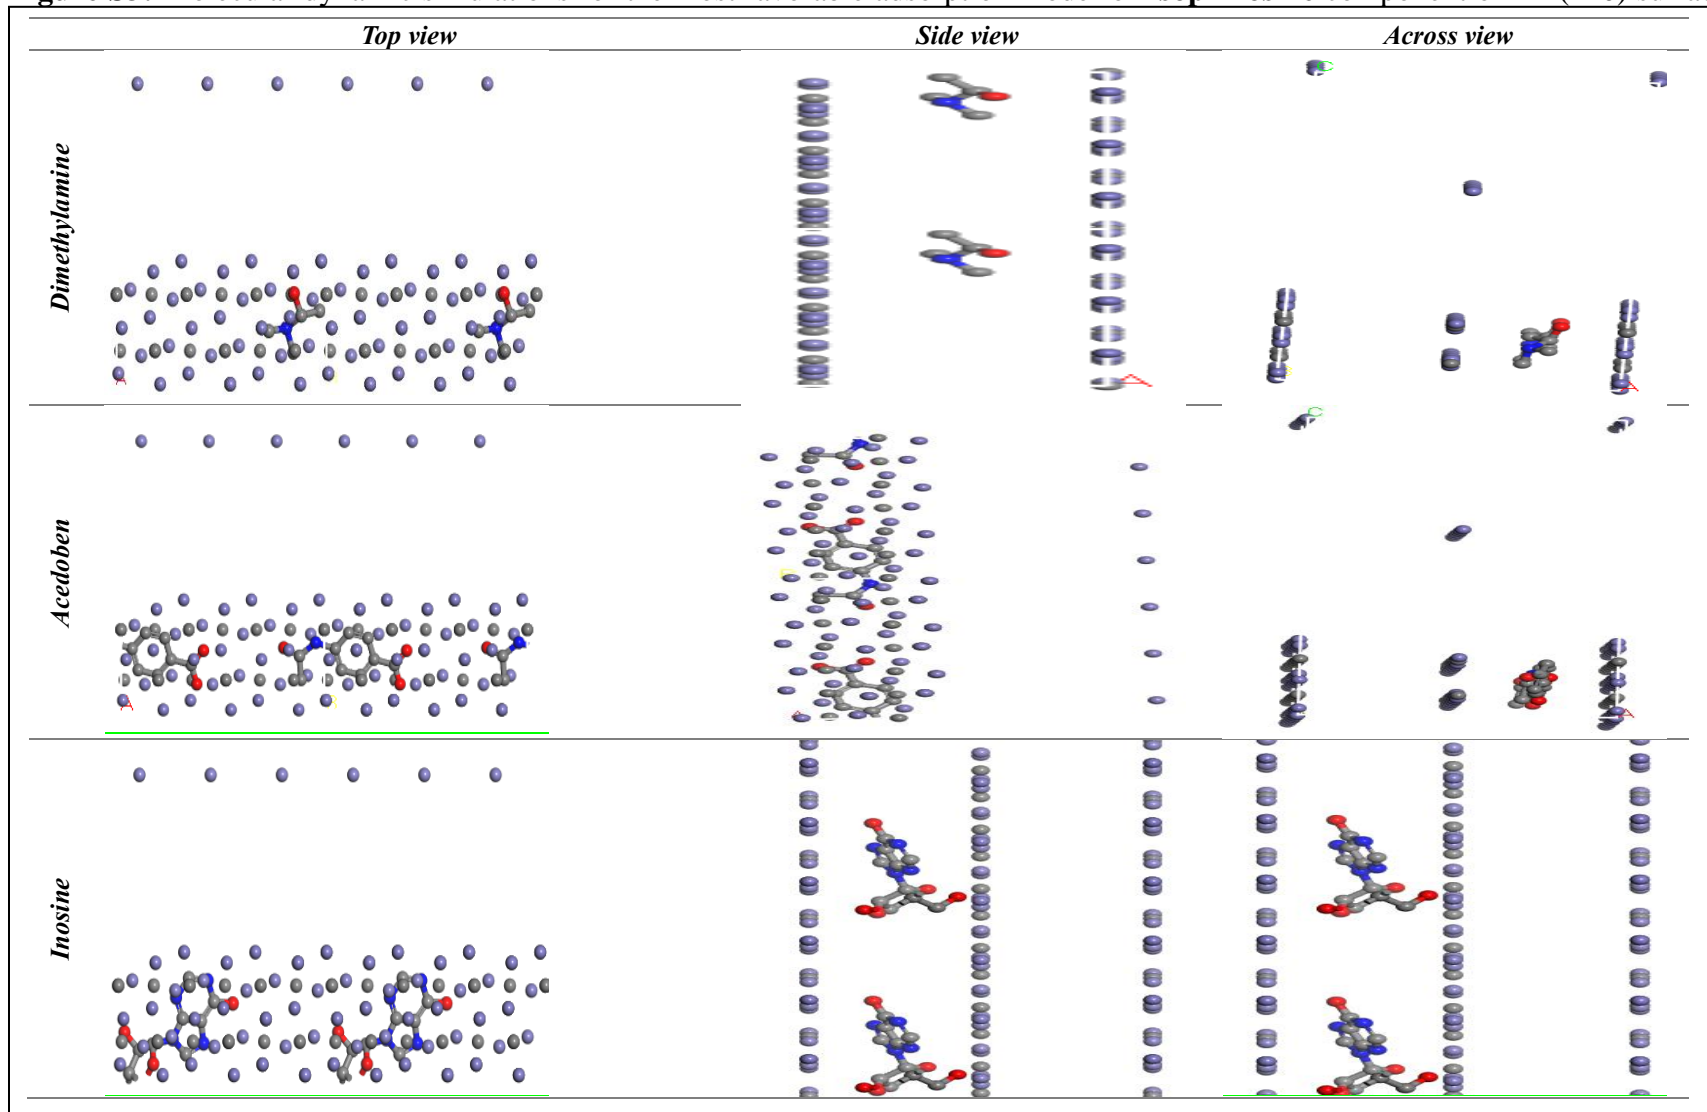

Supplement: d4ra00158c1.pdf [file d4ra00158c1.pdf]
